# Supplementary material
Source: PubMed Central journal article supplement (PMC5746467)

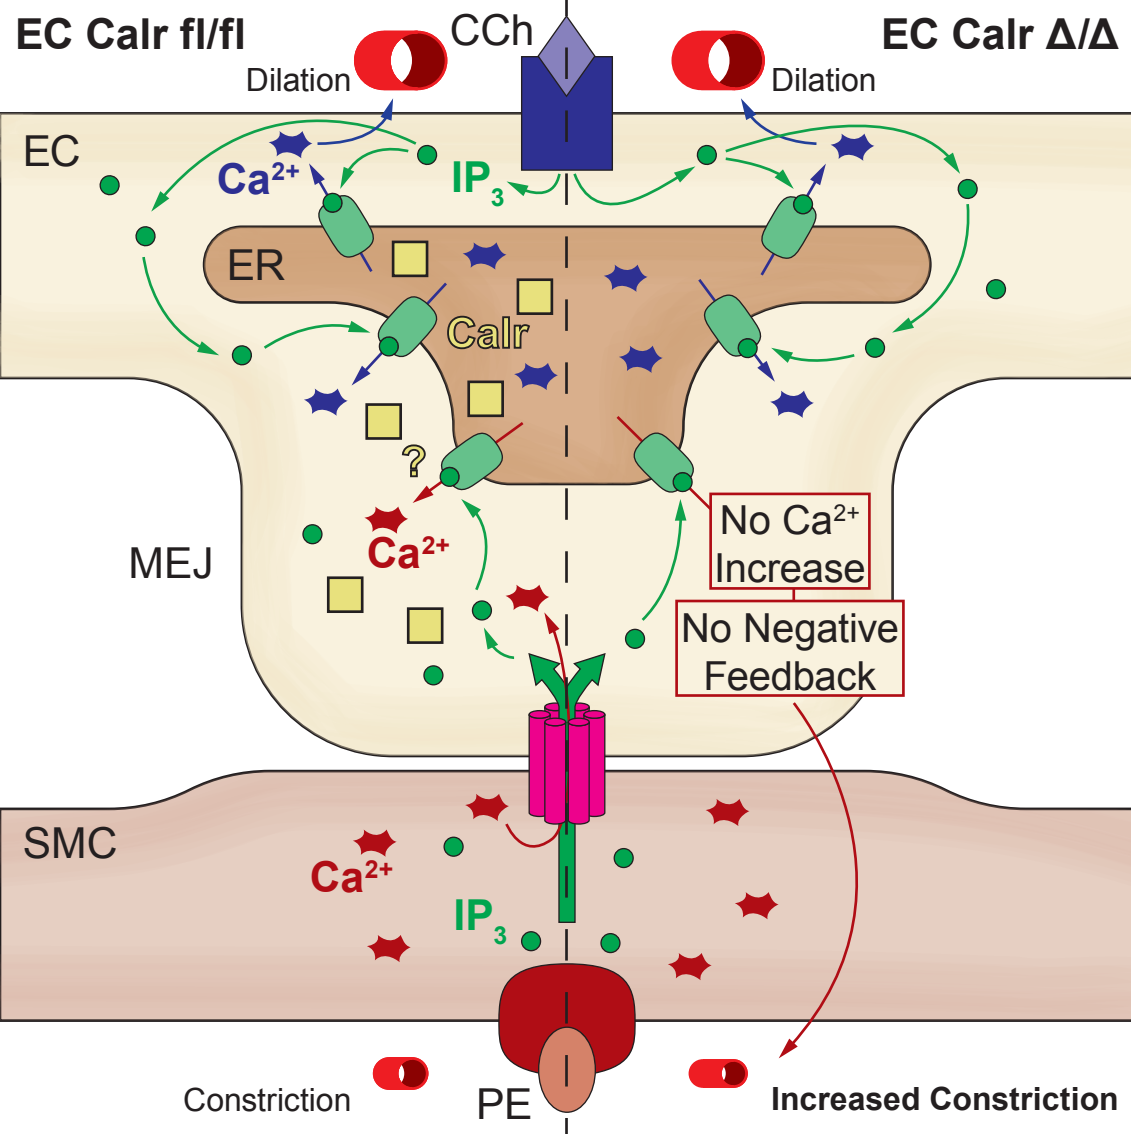

Supplement: NIHMS916182-supplement-Graphical_Abstract.pdf [file NIHMS916182-supplement-Graphical_Abstract.pdf]
